# Supplementary material
Source: PubMed Central journal article supplement (PMC2584812)
Supplement: 90586.2008_1.pdf [file 90586.2008_1.pdf]

**Supplemental Table.**

List of proteins identified with their corresponding peptide sequences, molecular weight (MH+), charge state (z) and Xcorr score (XC). Proteins are listed in an ascending order of their mean FSR values from six rats. The s.no. corresponds to the number in figure 1 and figure 4.

| s. no               | protein name                                 | FSR $\pm$<br>SEM | peptide sequence        | MH+        | z | XC   |
|---------------------|----------------------------------------------|------------------|-------------------------|------------|---|------|
| 1                   | Myosin heavy chain, skeletal muscle, adult 1 | 0.16 $\pm$ 0.04  | K.AITDAAMMAEELKK.E      | 1553.75550 | 2 | 4.17 |
|                     |                                              |                  | K.DIDDLELTLAK.V         | 1245.65780 | 2 | 4.37 |
|                     |                                              |                  | K.IAEKDEEIDQLKR.N       | 1586.83900 | 3 | 5.07 |
|                     |                                              |                  | K.IAEQELLDASER.V        | 1373.69120 | 2 | 4.14 |
|                     |                                              |                  | K.IEDEQALGMQLQK.K       | 1518.74740 | 2 | 5.15 |
|                     |                                              |                  | K.KAITDAAMMAEELKK.E     | 1681.85040 | 3 | 4.29 |
|                     |                                              |                  | K.KMEGDLNEMEIQLNHSNR.M  | 2189.99190 | 4 | 3.45 |
|                     |                                              |                  | K.LAQESTMDVENDKQQLDEK.L | 2237.02430 | 3 | 3.97 |
|                     |                                              |                  | K.NLTEEMAGLDETIK.L      | 1650.78960 | 2 | 5.39 |
|                     |                                              |                  | R.AEDEEEINAELTAK.K      | 1561.72330 | 2 | 5.05 |
|                     |                                              |                  | R.GKQAFQTQQIEELKR.Q     | 1675.91310 | 3 | 4.99 |
|                     |                                              |                  | R.IEEEEIEAER.A          | 1488.70700 | 2 | 5.01 |
|                     |                                              |                  | R.IQLELNQVK.S           | 1084.63660 | 2 | 3.33 |
|                     |                                              |                  | R.KIAEQELLDASER.V       | 1501.78620 | 3 | 3.80 |
|                     |                                              |                  | R.LDEAEQLALK.G          | 1129.61050 | 2 | 4.08 |
|                     |                                              |                  | R.LDEAEQLALKGGK.K       | 1371.74840 | 2 | 4.47 |
|                     |                                              |                  | R.LEEAGGATSAQIEMNK.K    | 1664.78010 | 2 | 6.37 |
|                     |                                              |                  | R.LINELTAQR.G           | 1057.60060 | 2 | 3.36 |
|                     |                                              |                  | R.LQNEVEDLMIDVER.T      | 1718.82710 | 2 | 5.20 |
|                     |                                              |                  | R.SLSTELFK.I            | 924.50420  | 2 | 2.39 |
| R.TLEDQVSELK.T      | 1161.60030                                   | 2                | 3.25                    |            |   |      |
| R.VQLLHTQNTSLINTK.K | 1709.95500                                   | 3                | 5.33                    |            |   |      |
| R.VVESMQSTLDAEIR.S  | 1593.77940                                   | 2                | 5.28                    |            |   |      |
| 2                   | myosin, light polypeptide 2                  | 0.20 $\pm$ 0.01  | K.EAFTVIDQNR.D          | 1192.59620 | 2 | 4.48 |
|                     |                                              |                  | K.EAFTVIDQNRDGIIDK.E    | 1833.93470 | 2 | 4.68 |
|                     |                                              |                  | K.GADPEDVITGAFK.V       | 1319.64830 | 2 | 4.64 |
|                     |                                              |                  | K.LKGADPEDVITGAFK.V     | 1560.82730 | 3 | 4.65 |
|                     |                                              |                  | K.NICYVITHGDAK.D        | 1390.70940 | 2 | 4.08 |
|                     |                                              |                  | K.NICYVITHGDAKDQE.-     | 1762.83760 | 2 | 5.04 |
|                     |                                              |                  | K.QFLEELLTTQCDR.F       | 1652.82590 | 2 | 4.76 |
|                     |                                              |                  | R.DGIIDKEDLR.D          | 1173.61150 | 2 | 3.09 |
|                     |                                              |                  | R.LNVKNEELDAMMK.E       | 1566.75070 | 2 | 4.53 |
| 3                   | tropomodulin 4                               | 0.27 $\pm$ 0.07  | K.ERDDLVPFTGEK.K        | 1405.69630 | 2 | 4.47 |
|                     |                                              |                  | K.ERDDLVPFTGEKK.G       | 1533.79130 | 2 | 4.22 |
|                     |                                              |                  | K.SGDPIANAVADMLR.E      | 1445.70580 | 2 | 5.00 |
|                     |                                              |                  | K.YRDIDEDEILR.T         | 1436.70210 | 3 | 4.61 |
|                     |                                              |                  | R.ENATLTEL.R.V          | 1046.54820 | 2 | 2.87 |
|                     |                                              |                  | R.SFSLVATK.S            | 852.48310  | 2 | 2.57 |
| 4                   | creatine kinase, muscle form                 | 0.30 $\pm$ 0.07  | K.DLFDPIIQDR.H          | 1231.63230 | 2 | 2.99 |
|                     |                                              |                  | K.FEEILTR.L             | 907.48890  | 2 | 2.82 |
|                     |                                              |                  | K.GGDDLDPNYVLSSR.V      | 1507.70290 | 2 | 4.96 |
|                     |                                              |                  | K.GQSIDDMIPAQK.-        | 1318.63130 | 2 | 4.21 |
|                     |                                              |                  | K.HKTDLNHENLK.G         | 1348.69730 | 3 | 3.13 |
|                     |                                              |                  | K.IEEIFK.K              | 778.43510  | 2 | 2.21 |
|                     |                                              |                  | K.IEEIFKK.A             | 906.53000  | 2 | 2.89 |
|                     |                                              |                  | K.LMVEMEK.K             | 911.42180  | 2 | 2.39 |
|                     |                                              |                  | K.SQEEYPDLK.H           | 1195.54830 | 2 | 3.62 |
|                     |                                              |                  | K.TDLNHENLK.G           | 1083.54350 | 2 | 3.08 |
|                     |                                              |                  | R.FCVGLQK.I             | 851.47550  | 2 | 2.42 |
|                     |                                              |                  | R.HGGFKPTDK.H           | 986.50600  | 2 | 3.11 |
|                     |                                              |                  | R.RFCVGLQK.I            | 1007.57660 | 2 | 2.64 |

|                  |                                                                     |             |                       |            |   |      |
|------------------|---------------------------------------------------------------------|-------------|-----------------------|------------|---|------|
| 5                | <b>TROPONIN C, SKELETAL MUSCLE</b>                                  | 0.32 ± 0.09 | K.GKSEEELAEFCR.I      | 1454.68910 | 2 | 4.29 |
|                  |                                                                     |             | R.ASGEHVTDEEIESLMK.D  | 1790.81180 | 2 | 5.19 |
|                  |                                                                     |             | R.IDFDEFLK.M          | 1026.51480 | 2 | 2.22 |
|                  |                                                                     |             | R.SYLSEEMIAEFK.A      | 1462.67760 | 2 | 4.69 |
| 6                | <b>leucine zipper-EF-hand containing transmembrane protein 1</b>    | 0.33 ± 0.09 | K.ADDKLISEEGVDSLTVK.E | 1818.93370 | 2 | 5.41 |
|                  |                                                                     |             | K.LISEEGVDSLTVK.E     | 1389.74770 | 2 | 4.61 |
|                  |                                                                     |             | K.MVDVIPPEILK.D       | 1356.74480 | 2 | 3.02 |
|                  |                                                                     |             | K.STLQTLPEIVAK.E      | 1299.75240 | 2 | 3.52 |
|                  |                                                                     |             | K.TGDEKYIEESTASKR.L   | 1713.82950 | 3 | 5.66 |
|                  |                                                                     |             | R.AMYLPDTLSPADQLK.S   | 1678.83620 | 2 | 4.42 |
| R.FQLTMR.L       | 811.41360                                                           | 2           | 2.01                  |            |   |      |
| 7                | <b>3-hydroxyacyl-CoA dehydrogenase type II</b>                      | 0.34 ± 0.08 | K.EVQAALTLAK.E        | 1043.61010 | 2 | 2.96 |
|                  |                                                                     |             | K.GGIVGMTLPIAR.D      | 1200.67740 | 2 | 4.16 |
|                  |                                                                     |             | K.LGGNCIFAPANVTSEK.E  | 1677.85760 | 2 | 3.90 |
|                  |                                                                     |             | K.NQVHTLEDFQR.V       | 1386.67660 | 2 | 3.83 |
|                  |                                                                     |             | R.LVAGVMGQNEPDQGGQR.G | 1755.84480 | 2 | 6.01 |
| R.NFLASQVPFPSR.L | 1362.71700                                                          | 2           | 4.23                  |            |   |      |
| 8                | <b>coiled-coil-helix-coiled-coil-helixdomaincontaining3</b>         | 0.34 ± 0.06 | K.AVANEQLTR.A         | 1001.53800 | 2 | 3.33 |
|                  |                                                                     |             | K.ILQCYR.Q            | 852.47070  | 2 | 2.28 |
|                  |                                                                     |             | R.KQDAFYK.E           | 899.46270  | 2 | 2.98 |
|                  |                                                                     |             | R.LSENVDR.M           | 945.50050  | 2 | 3.19 |
|                  |                                                                     |             | R.RVAEELALEQAK.M      | 1356.74870 | 2 | 4.45 |
|                  |                                                                     |             | R.VAEELALEQAK.M       | 1200.64760 | 2 | 4.56 |
|                  |                                                                     |             | R.YEYHPVCADLQTK.I     | 1623.77820 | 3 | 3.32 |
|                  |                                                                     |             | R.YSSVYGASVSDEELK.R   | 1633.75970 | 2 | 5.38 |
| 9                | <b>NAD<sup>+</sup>-isocitrate dehydrogenase, gamma subunit</b>      | 0.35 ± 0.06 | K.DIDILIVR.E          | 956.57810  | 2 | 2.71 |
|                  |                                                                     |             | K.GNIETNHNLPESHK.S    | 1557.77740 | 2 | 4.08 |
|                  |                                                                     |             | K.SLPGVVTR.H          | 828.49430  | 2 | 2.13 |
|                  |                                                                     |             | R.NAIMAIR.R           | 804.44020  | 2 | 2.47 |
| 10               | <b>pyruvate dehydrogenase (lipoamide) beta</b>                      | 0.35 ± 0.05 | K.DFLIPIGK.A          | 902.53510  | 2 | 2.01 |
|                  |                                                                     |             | K.DIIFAIK.K           | 819.49800  | 2 | 2.01 |
|                  |                                                                     |             | K.DIIFAIK.T           | 947.59300  | 2 | 2.45 |
|                  |                                                                     |             | K.EGIECEVINLR.T       | 1331.69350 | 2 | 3.63 |
|                  |                                                                     |             | K.ILEDNSIPQVK.D       | 1255.68980 | 2 | 3.99 |
|                  |                                                                     |             | R.EAINQGMDEELERDEK.V  | 1921.84490 | 2 | 4.01 |
|                  |                                                                     |             | R.PVGHCLEAAAVLSK.E    | 1451.79860 | 3 | 5.84 |
|                  |                                                                     |             | R.TIRPMDIEAIEASVMK.T  | 1835.92470 | 3 | 4.33 |
| R.VTGADVMPYAK.I  | 1264.62470                                                          | 2           | 3.96                  |            |   |      |
| 11               | <b>striated muscle alpha tropomyosin</b>                            | 0.35 ± 0.10 | K.AISEELDHALNDMTSI.-  | 1774.81690 | 2 | 3.53 |
|                  |                                                                     |             | K.HIAEDADRKYEEVAR.K   | 1801.88330 | 4 | 2.85 |
|                  |                                                                     |             | K.LVIIESDLER.A        | 1186.66830 | 2 | 3.61 |
|                  |                                                                     |             | K.MEIQEIQLK.E         | 1147.60330 | 2 | 3.35 |
|                  |                                                                     |             | K.SIDDLEDELYAQK.L     | 1538.72260 | 2 | 5.00 |
|                  |                                                                     |             | R.AQKDEEKMEIQEIQLK.E  | 1976.00100 | 3 | 4.85 |
|                  |                                                                     |             | R.KLVIIESDLER.A       | 1314.76330 | 3 | 4.23 |
| 12               | <b>KCRS_RAT creatine kinase, sarcomeric mitochondrial precursor</b> | 0.36 ± 0.08 | K.HPTDL DASK.I        | 983.47980  | 2 | 2.26 |
|                  |                                                                     |             | K.ILENLR.L            | 757.45720  | 2 | 2.11 |
|                  |                                                                     |             | K.ITHGQFDER.Y         | 1102.52810 | 2 | 2.79 |
|                  |                                                                     |             | K.LSEMTEQDQQR.L       | 1364.61160 | 2 | 4.32 |
|                  |                                                                     |             | K.VPPPLPQFGR.K        | 1107.63150 | 2 | 2.09 |
|                  |                                                                     |             | R.GLSLPPACSR.A        | 1057.57700 | 2 | 2.70 |
|                  |                                                                     |             | R.VMKHPTDL DASK.I     | 1357.67860 | 2 | 3.48 |

|    |                                                                    |             |                        |            |   |      |
|----|--------------------------------------------------------------------|-------------|------------------------|------------|---|------|
| 13 | cytochrome c oxidase subunit Vb                                    | 0.37 ± 0.05 | K.AASGTKEDPNLVPSVSNK.R | 1813.92960 | 3 | 3.69 |
|    |                                                                    |             | K.EDPNLVPSVSNK.R       | 1298.65920 | 2 | 2.75 |
|    |                                                                    |             | R.GLDPYNMLPPK.A        | 1260.62980 | 2 | 3.33 |
| 14 | Troponin T, fast skeletal muscle isoforms beta/alpha               | 0.37 ± 0.10 | K.IPEGEKVDFFDIQK.K     | 1632.81210 | 2 | 5.07 |
|    |                                                                    |             | K.IPEGEKVDFFDIQKK.R    | 1760.90710 | 2 | 4.63 |
|    |                                                                    |             | K.VDFDDIQK.K           | 979.47360  | 2 | 2.56 |
|    |                                                                    |             | R.KKEEEEELIALK.E       | 1329.76300 | 2 | 4.82 |
| 15 | ubiquinol-cytochrome c reductase, Rieske iron-sulfur polypeptide 1 | 0.38 ± 0.07 | K.EIDQEAHAVEVSQLR.D    | 1586.80260 | 2 | 5.25 |
|    |                                                                    |             | K.VPDFSDYR.R           | 998.45830  | 2 | 2.41 |
|    |                                                                    |             | K.VPDFSDYRR.A          | 1154.55940 | 2 | 2.51 |
| 16 | hypothetical protein MGC36907                                      | 0.38 ± 0.05 | R.FLEQQNKVLETK.W       | 1476.80620 | 2 | 4.49 |
| 17 | Complement component 1 Q subcomponent-binding protein              | 0.38 ± 0.08 | K.MSGDWELEVNGTEAK.L    | 1681.73790 | 2 | 4.75 |
| 18 | DNA segment, Chr 10, Johns Hopkins University 81 expressed         | 0.38 ± 0.04 | K.GVEVTVGHEQEEGGK.W    | 1554.74000 | 2 | 4.63 |
|    |                                                                    |             | K.KPIGLCCIPVLA AK.V    | 1610.97370 | 2 | 4.74 |
|    |                                                                    |             | K.NLSTFAVDGK.D         | 1051.54240 | 2 | 3.38 |
|    |                                                                    |             | K.VLELTGK.-            | 759.46160  | 2 | 2.10 |
|    |                                                                    |             | K.WPYAGTAEAVK.A        | 1192.60020 | 2 | 3.58 |
|    |                                                                    |             | R.NVLAESAR.I           | 859.46380  | 2 | 2.13 |
| 19 | prohibitin                                                         | 0.38 ± 0.02 | K.DLQNVNITLR.I         | 1185.65920 | 2 | 4.24 |
|    |                                                                    |             | K.EFTEAVEAK.Q          | 1023.49990 | 2 | 2.38 |
|    |                                                                    |             | K.KAAII SAEGDSK.A      | 1189.64280 | 2 | 3.80 |
|    |                                                                    |             | K.VFESIGK.F            | 779.43030  | 2 | 2.42 |
|    |                                                                    |             | R.FDAGELITQR.E         | 1149.59040 | 2 | 4.13 |
|    |                                                                    |             | R.FVVEKAEQQK.K         | 1205.65300 | 2 | 3.17 |
|    |                                                                    |             | R.ILFRPVASQLPR.I       | 1396.84290 | 2 | 3.18 |
|    |                                                                    |             | R.IYTSIGEDYDER.V       | 1460.65450 | 2 | 4.26 |
|    |                                                                    |             | R.KLEAAEDIA YQLSR.S    | 1606.84410 | 2 | 5.67 |
|    |                                                                    |             | R.QVSDDLTER.A          | 1062.50670 | 2 | 2.09 |
|    |                                                                    |             | R.VLPSITTEILK.S        | 1213.74080 | 2 | 2.70 |
| 20 | acyl-Coenzyme A dehydrogenase, very long chain                     | 0.38 ± 0.07 | K.GILLYGTK.A           | 864.51950  | 2 | 2.58 |
|    |                                                                    |             | K.SFAVGMFK.G           | 902.44460  | 2 | 2.51 |
|    |                                                                    |             | K.VEEDTLQGLK.E         | 1131.58970 | 2 | 3.56 |
|    |                                                                    |             | R.FFEEVNDPAK.N         | 1195.56350 | 2 | 4.21 |
|    |                                                                    |             | R.FFEEVNDPAK NDSLEK.V  | 1881.88700 | 2 | 5.57 |
| 21 | malate dehydrogenase 2                                             | 0.39 ± 0.05 | K.AGAGSATLSMAYAGAR.F   | 1454.70620 | 2 | 5.30 |
|    |                                                                    |             | K.EGVIECSFVQSK.E       | 1382.69310 | 2 | 3.96 |
|    |                                                                    |             | K.GCDVVVIPAGVPR.K      | 1338.75090 | 2 | 4.60 |
|    |                                                                    |             | K.GYLGPEQLPDCLK.G      | 1489.76660 | 2 | 4.43 |
|    |                                                                    |             | K.HGVYNPNK.I           | 928.46410  | 2 | 3.42 |
|    |                                                                    |             | K.IFGVTTLDIVR.A        | 1233.72070 | 2 | 3.97 |
|    |                                                                    |             | K.IQEAGTEVVK.A         | 1073.58430 | 2 | 3.05 |
|    |                                                                    |             | K.TIIP LISQCTPK.V      | 1370.80230 | 2 | 3.95 |
|    |                                                                    |             | R.ANTFVAELK.G          | 992.54170  | 2 | 3.05 |
|    |                                                                    |             | R.FVFSLV DAMNGK.E      | 1343.66690 | 2 | 3.42 |
|    |                                                                    |             | R.VNVPVIGGHAGK.T       | 1147.65880 | 2 | 3.85 |
| 22 | LRP16 protein                                                      | 0.40 ± 0.06 | R.AAGSLLTDECR.T        | 1192.59370 | 2 | 3.83 |
|    |                                                                    |             | R.LPHYFPVA.-           | 943.50     | 2 | 2.72 |

|                   |                                                         |             |                        |                                                |             |               |
|-------------------|---------------------------------------------------------|-------------|------------------------|------------------------------------------------|-------------|---------------|
| 23                | <b>Pyruvate dehydrogenase (lipoamide) alpha 1</b>       | 0.40 ± 0.07 | K.LPCIFICENNR.Y        | 1435.74370                                     | 2           | 4.24          |
|                   |                                                         |             | K.RGDFIPGLR.V          | 1030.57980                                     | 2           | 3.19          |
|                   |                                                         |             | R.SGKGPILMELQTYR.Y     | 1608.84190                                     | 2           | 4.32          |
|                   |                                                         |             | R.SKSDPIMLLK.D         | 1147.63970                                     | 2           | 2.57          |
|                   |                                                         |             | R.SKSDPIMLLKDR.M       | 1418.76770                                     | 2           | 3.30          |
|                   |                                                         |             | R.TREEIQEVR.S          | 1159.60710                                     | 2           | 3.44          |
|                   |                                                         |             | R.VDGMDCVLR.E          | 1193.59640                                     | 2           | 4.01          |
|                   |                                                         |             | R.YHGHSMSDPGVSYR.T     | 1608.68650                                     | 2           | 3.56          |
| 24                | <b>calreticulin</b>                                     | 0.42 ± 0.09 | K.FYGDQEKDKGLQTSQDAR.F | 2085.98410                                     | 2           | 6.12          |
|                   |                                                         |             | K.GQTLVVQFTVK.H        | 1219.70500                                     | 2           | 4.11          |
|                   |                                                         |             | K.IKDPDAAKPEDWDER.A    | 1784.84550                                     | 2           | 3.98          |
|                   |                                                         |             | K.KVHVIFNYK.G          | 1147.66280                                     | 2           | 2.90          |
|                   |                                                         |             | K.SDFGKFLSSGK.F        | 1271.66360                                     | 2           | 4.17          |
|                   |                                                         |             | K.VHVIFNYK.G           | 1019.56780                                     | 2           | 2.47          |
|                   |                                                         |             | 25                     | <b>NADP+-specific isocitrate dehydrogenase</b> | 0.42 ± 0.04 | K.LDGNQDLIR.F |
| K.SSGFVWACK.N     | 1098.53480                                              | 2           |                        |                                                |             | 4.18          |
| K.TIEAAAHGTVTR.H  | 1355.69190                                              | 2           |                        |                                                |             | 4.49          |
| K.VCVQTVESGAMTK.D | 1425.70230                                              | 2           |                        |                                                |             | 5.17          |
| R.FAQMLEK.V       | 836.45180                                               | 2           |                        |                                                |             | 2.86          |
| R.GKLDGNQDLIR.F   | 1228.66500                                              | 2           |                        |                                                |             | 3.97          |
| 26                | <b>Heat shock cognate 71 kDa protein</b>                | 0.42 ± 0.04 | K.DAGTIAGLNVLRI        | 1199.67480                                     | 2           | 4.19          |
|                   |                                                         |             | K.MKEIAEAYLGK.T        | 1268.65600                                     | 2           | 3.82          |
|                   |                                                         |             | K.SFYPEEVSSMVLTK.M     | 1632.78310                                     | 2           | 4.83          |
|                   |                                                         |             | K.STAGDTHLGGEDFDNR.M   | 1691.72610                                     | 2           | 4.85          |
|                   |                                                         |             | K.VQVEYKGETK.S         | 1180.62140                                     | 2           | 3.19          |
| 27                | <b>NAD+-specific isocitrate dehydrogenase b subunit</b> | 0.43 ± 0.13 | K.AAAVPVEFK.E          | 931.52530                                      | 2           | 2.50          |
|                   |                                                         |             | K.EHHLSEVQNMASEEK.L    | 1783.79210                                     | 3           | 4.51          |
|                   |                                                         |             | K.EHHLSEVQNMASEEK.L    | 1767.79720                                     | 3           | 3.58          |
|                   |                                                         |             | K.GELASYDMQLR.R        | 1298.60510                                     | 2           | 3.79          |
|                   |                                                         |             | K.LEQVLSSMK.E          | 1050.55050                                     | 2           | 3.42          |
|                   |                                                         |             | K.LEQVLSSMKENK.V       | 1421.73100                                     | 2           | 3.95          |
|                   |                                                         |             | R.EQTEGEYSSLEHESAR.G   | 1851.79970                                     | 2           | 4.53          |
|                   |                                                         |             | R.HNNLDLVIIR.E         | 1206.69590                                     | 2           | 4.21          |
| 28                | <b>ATP synthase subunit d</b>                           | 0.43 ± 0.06 | K.NCAQFVTGSQAR.V       | 1338.65300                                     | 2           | 4.88          |
|                   |                                                         |             | K.SWNETFHTR.L          | 1177.53900                                     | 2           | 2.85          |
|                   |                                                         |             | K.YNALKIPVPEDK.Y       | 1386.76330                                     | 3           | 3.70          |
|                   |                                                         |             | R.ANVDKPGLVDDFK.N      | 1417.73270                                     | 2           | 4.32          |
|                   |                                                         |             | R.ANVDKPGLVDDFKNK.Y    | 1659.87060                                     | 3           | 4.76          |
| 29                | <b>peroxiredoxin 5 precursor</b>                        | 0.43 ± 0.09 | K.KVNLAELFK.D          | 1061.63590                                     | 2           | 2.90          |
|                   |                                                         |             | K.VNLAELFK.D           | 933.54090                                      | 2           | 2.73          |
|                   |                                                         |             | K.VQLLADPTGAFGK.E      | 1316.72140                                     | 2           | 4.17          |
|                   |                                                         |             | R.FSMVIDK.G            | 855.42860                                      | 2           | 2.94          |
| 30                | <b>hydroxyacyl-Coenzyme A dehydrogenase</b>             | 0.43 ± 0.09 | K.DTTASAVAVGLK.Q       | 1132.62140                                     | 2           | 4.30          |
|                   |                                                         |             | K.GFYIYQSGSK.N         | 1149.55800                                     | 2           | 3.96          |
|                   |                                                         |             | K.MQLLEIITTDK.T        | 1320.70850                                     | 2           | 4.10          |
|                   |                                                         |             | K.MQLLEIITTDKTSK.D     | 1636.88310                                     | 2           | 4.55          |
|                   |                                                         |             | K.VIGMHYFSPVDK.M       | 1408.69350                                     | 2           | 4.10          |
|                   |                                                         |             | R.C*LAPMMSEVIR.I       | 1338.65250                                     | 2           | 2.95          |
|                   |                                                         |             | R.FGGGSVELLK.L         | 1006.55730                                     | 2           | 3.59          |
|                   |                                                         |             | R.FVDLYGAQK.V          | 1040.54170                                     | 2           | 3.16          |
|                   |                                                         |             | R.LPAKPEVSSDEDIQYR.V   | 1846.91870                                     | 3           | 5.41          |

|               |                                                                    |             |                        |            |   |      |
|---------------|--------------------------------------------------------------------|-------------|------------------------|------------|---|------|
| 31            | <b>Mitochondrial aconitase</b>                                     | 0.44 ± 0.05 | K.LEAPDADELPR.S        | 1225.60650 | 2 | 4.13 |
|               |                                                                    |             | K.LTGTLSGWTSPPK.D      | 1247.66360 | 2 | 3.58 |
|               |                                                                    |             | K.LTIQGLK.D            | 772.49330  | 2 | 2.17 |
|               |                                                                    |             | K.NTIVTSYNR.N          | 1067.54850 | 2 | 3.25 |
|               |                                                                    |             | K.SQFTITPGSEQIR.A      | 1463.74940 | 2 | 4.17 |
|               |                                                                    |             | K.VAGILTVK.G           | 800.52460  | 2 | 2.57 |
|               |                                                                    |             | R.DGYAQILR.D           | 935.49510  | 2 | 3.13 |
|               |                                                                    |             | R.EHAALPR.H            | 922.47470  | 2 | 2.56 |
|               |                                                                    |             | R.IHETNLK.K            | 854.47360  | 2 | 2.22 |
|               |                                                                    |             | R.LQLLEPFDK.W          | 1102.61480 | 2 | 2.72 |
|               |                                                                    |             | R.NAVTQEFQVPTAR.Y      | 1601.79240 | 2 | 3.27 |
|               |                                                                    |             | R.SDFDPGQDQYQHPPK.D    | 1731.76140 | 2 | 2.45 |
|               |                                                                    |             | R.VDVSPQSQR.L          | 988.50630  | 2 | 2.99 |
|               |                                                                    |             | R.VGLIGSCTNSSYEDMGR.S  | 1861.83660 | 2 | 5.37 |
|               |                                                                    |             | R.WVIGDENYEGSSR.E      | 1667.76650 | 2 | 4.81 |
| 32            | <b>superoxide dismutase 2, mitochondrial</b>                       | 0.44 ± 0.08 | K.GDVTTQVALQPALK.F     | 1440.80620 | 3 | 5.28 |
|               |                                                                    |             | K.GELLEAIK.R           | 872.50930  | 2 | 2.92 |
|               |                                                                    |             | K.GELLEAIKR.D          | 1028.61040 | 2 | 2.97 |
|               |                                                                    |             | K.HHATYVNNLNVTEEK.Y    | 1768.86180 | 2 | 4.52 |
|               |                                                                    |             | K.NVRPDYLK.A           | 1004.55290 | 2 | 2.85 |
|               |                                                                    |             | K.RDFGSFEK.F           | 985.47430  | 2 | 3.09 |
|               |                                                                    |             | K.YHEALAK.G            | 831.43650  | 2 | 2.73 |
| 33            | <b>myosin, light polypeptide 3</b>                                 | 0.45 ± 0.04 | K.AAPAPAAAPAAPEPERPK.E | 1782.95030 | 2 | 5.22 |
|               |                                                                    |             | K.ITYGQCGDVL.R.A       | 1281.65670 | 2 | 3.53 |
|               |                                                                    |             | R.ALGQNPTQAEVLR.V      | 1396.75480 | 2 | 4.55 |
|               |                                                                    |             | R.HVLATLGER.L          | 995.56380  | 2 | 2.96 |
|               |                                                                    |             | R.VFDKEGNGTVMGAELR.H   | 1738.84340 | 2 | 4.97 |
|               |                                                                    |             | R.VLGKPKQEELNSK.M      | 1469.83280 | 2 | 2.62 |
| 34            | <b>Succinyl-Co A ligase beta-chain, mitochondrial</b>              | 0.46 ± 0.12 | K.INFDSNSAYR.Q         | 1186.54930 | 2 | 3.73 |
|               |                                                                    |             | K.ILACDDLDEAAK.M       | 1333.66150 | 2 | 4.02 |
|               |                                                                    |             | K.YDATMVEINPMVEDADGK.V | 2029.87340 | 2 | 5.90 |
|               |                                                                    |             | K.LYNLFLK.Y            | 910.54020  | 2 | 2.37 |
| 35            | <b>prolyl 4-hydroxylase, beta polypeptide</b>                      | 0.46 ± 0.11 | K.FFKNGDTASPK.E        | 1211.60610 | 2 | 2.35 |
|               |                                                                    |             | K.FFPASADR.T           | 910.44230  | 2 | 2.26 |
|               |                                                                    |             | K.LGETYKDHENIVIAK.M    | 1729.91250 | 3 | 5.44 |
|               |                                                                    |             | K.MDSTANEVEAVK.V       | 1309.59460 | 2 | 4.17 |
|               |                                                                    |             | K.NFEEVAFDEK.K         | 1227.55340 | 2 | 3.48 |
|               |                                                                    |             | K.NFEEVAFDEKK.N        | 1355.64830 | 2 | 4.09 |
|               |                                                                    |             | K.THILLFLPK.S          | 1081.67740 | 2 | 3.35 |
|               |                                                                    |             | K.VDATEESDLAQQYGVR.G   | 1780.83530 | 2 | 5.74 |
|               |                                                                    |             | K.YKPESDELTAEK.I       | 1409.68000 | 3 | 4.44 |
|               |                                                                    |             | K.YQLDKDGVVLFK.K       | 1424.77890 | 2 | 3.88 |
|               |                                                                    |             | R.ILEFFGLK.K           | 966.56640  | 2 | 2.28 |
|               |                                                                    |             | R.ILEFFGLKK.E          | 1094.66140 | 2 | 2.83 |
|               |                                                                    |             | R.LITLLEEEMTK.Y        | 1222.62410 | 2 | 3.65 |
|               |                                                                    |             | R.NNFEGEITK.E          | 1051.50600 | 2 | 2.73 |
|               |                                                                    |             | R.NNFEGEITKEK.L        | 1308.64360 | 2 | 2.65 |
| R.TVIDYNGER.T | 1066.51690                                                         | 2           | 2.73                   |            |   |      |
| 36            | <b>electron-transfer-flavoprotein, beta polypeptide</b>            | 0.47 ± 0.11 | K.AGDLGVDLTSK.V        | 1075.56350 | 2 | 3.58 |
|               |                                                                    |             | K.VETTEDLVAK.L         | 1104.57880 | 2 | 2.93 |
|               |                                                                    |             | K.VSVISVEEPPQR.L       | 1339.72220 | 2 | 3.42 |
| 37            | <b>NADH dehydrogenase (ubiquinone) 1 beta subcomplex, 10, 22kD</b> | 0.47 ± 0.08 | K.ELEQFTQVSK.A         | 1208.61630 | 2 | 3.47 |
|               |                                                                    |             | K.VDQEIINIQR.L         | 1469.79640 | 2 | 4.10 |
|               |                                                                    |             | R.EFIEQQHAK.N          | 1129.56420 | 2 | 3.03 |
|               |                                                                    |             | R.EGESALQNCAK.E        | 1206.57300 | 2 | 4.00 |

|    |                                                                               |             |                           |            |   |      |
|----|-------------------------------------------------------------------------------|-------------|---------------------------|------------|---|------|
|    |                                                                               |             | R.RVPDITECK.E             | 1117.59810 | 2 | 2.82 |
|    |                                                                               |             | R.VPDITECK.E              | 961.49700  | 2 | 2.75 |
|    |                                                                               |             | R.YQDLGAYYSAR.K           | 1306.60680 | 2 | 3.97 |
| 38 | <b>Polymerase (RNA) II (DNA directed) polypeptide C</b>                       | 0.48 ± 0.07 | R.LNHVLEEEQK.L            | 1238.63810 | 2 | 2.83 |
|    |                                                                               |             | R.SSEEQRQQPPHSSQQHSETQC   | 3455.60770 | 5 | 2.70 |
|    |                                                                               |             | R.YTDQSGEEEEEDYESEEQIQHR. | 2601.05010 | 3 | 5.15 |
| 39 | <b>Dihydrolipoamide succinyltransferase</b>                                   | 0.48 ± 0.06 | R.NVETMNYADIER.T          | 1470.65350 | 2 | 4.82 |
|    |                                                                               |             | K.VEGGTPLFTRLR.T          | 1317.75    | 2 | 3.03 |
|    |                                                                               |             | K.VEGGTPLFTRLR.K          | 1189.66    | 2 | 3.19 |
| 40 | <b>alpha 1 actin precursor</b>                                                | 0.48 ± 0.08 | K.DLYANNVMSGGTTMYPGIADR.  | 2278.01200 | 2 | 5.58 |
|    |                                                                               |             | R.GYSFVTTAER.E            | 1130.54820 | 2 | 3.98 |
|    |                                                                               |             | R.KDLYANNVMSGGTTMYPGIADP  | 2406.10690 | 3 | 6.43 |
|    |                                                                               |             | R.VAPEEHPTLLTEAPLNPK.A    | 1956.04420 | 2 | 4.60 |
| 41 | <b>3-mercaptopyruvate sulfurtransferase</b>                                   | 0.49 ± 0.06 | K.THEDILENLDR.R           | 1425.69740 | 2 | 4.51 |
| 42 | <b>acetyl-Coenzyme A dehydrogenase, long-chain</b>                            | 0.49 ± 0.11 | K.CIGAIAMTEPGAGSDLQGVR.T  | 2018.99450 | 2 | 6.25 |
|    |                                                                               |             | K.EQIEQFIPQMTAGK.C        | 1635.80520 | 2 | 5.24 |
|    |                                                                               |             | K.KLTDIGIRR.I             | 1071.66380 | 2 | 2.33 |
|    |                                                                               |             | K.QGLLGINIAEK.H           | 1155.67370 | 2 | 2.30 |
|    |                                                                               |             | R.IFSSEHDIFR.E            | 1250.61700 | 2 | 3.13 |
| 43 | <b>ATPase, Ca++ transporting, cardiac muscle, fast twitch 1</b>               | 0.49 ± 0.13 | K.EVTGSIQLCR.D            | 1162.61960 | 2 | 2.52 |
|    |                                                                               |             | R.DTPPKREEMVLDDSAK.F      | 1846.88560 | 2 | 3.16 |
|    |                                                                               |             | R.EFDDLPLAEQR.E           | 1332.64360 | 2 | 3.56 |
|    |                                                                               |             | R.IGIFSENEEVADR.A         | 1478.71270 | 2 | 4.46 |
|    |                                                                               |             | R.KEVTGSIQLCR.D           | 1290.71450 | 2 | 3.79 |
|    |                                                                               |             | R.RIGIFSENEEVADR.A        | 1634.81380 | 2 | 4.23 |
|    |                                                                               |             | R.VGTTRVPLTGPVK.E         | 1324.79530 | 2 | 4.06 |
|    |                                                                               |             | R.VGTTRVPLTGPVKEK.I       | 1581.93280 | 2 | 3.86 |
|    |                                                                               |             | R.VPLTGPVKEK.I            | 1067.64650 | 2 | 3.12 |
| 44 | <b>enoyl Coenzyme A hydratase, short chain 1</b>                              | 0.49 ± 0.06 | K.AFAAGADIK.E             | 863.46270  | 2 | 2.88 |
|    |                                                                               |             | K.AFAAGADIKEMQNR.T        | 1537.74330 | 2 | 4.89 |
|    |                                                                               |             | K.GKNSSVGLIQLNRPK.A       | 1610.93420 | 2 | 4.97 |
|    |                                                                               |             | K.LFYSTFATDDRR.E          | 1491.72320 | 2 | 2.95 |
|    |                                                                               |             | K.NSSVGLIQLNRPK.A         | 1425.81780 | 2 | 3.68 |
|    |                                                                               |             | K.SLAMEMVLTGDR.I          | 1354.63460 | 2 | 4.35 |
|    |                                                                               |             | R.TFQDCYSGK.F             | 1105.49300 | 2 | 2.98 |
| 45 | <b>ATP synthase, H+ transporting, mitochondrial F1 complex, delta subunit</b> | 0.50 ± 0.09 | K.AQSELSGAADEAAR.A        | 1375.64540 | 2 | 4.84 |
|    |                                                                               |             | R.IEANEALVK.A             | 986.55220  | 2 | 3.07 |
| 46 | <b>fast myosin alkali light chain</b>                                         | 0.50 ± 0.10 | K.DQGGYEDFVEGLR.V         | 1484.66580 | 2 | 4.41 |
|    |                                                                               |             | K.EAFLLFDR.T              | 1010.53110 | 2 | 2.98 |
|    |                                                                               |             | K.ITLSQVGDVLR.A           | 1200.69520 | 2 | 4.59 |
|    |                                                                               |             | K.VLGNPSNEEMNAK.K         | 1418.65850 | 2 | 3.99 |
|    |                                                                               |             | R.ALGTNPTNAEVK.K          | 1214.63810 | 2 | 3.97 |
| 47 | <b>H(+)-transporting ATP synthase</b>                                         | 0.50 ± 0.07 | K.GIRPAINVGLSVSR.V        | 1438.84940 | 2 | 4.25 |
|    |                                                                               |             | K.QVAGTMKLELAQYR.E        | 1623.85280 | 2 | 3.36 |
|    |                                                                               |             | K.QVAGTMKLELAQYR.E        | 1607.85790 | 2 | 2.67 |
|    |                                                                               |             | R.AMKQVAGTMKLELAQYR.E     | 1970.02030 | 3 | 4.35 |
|    |                                                                               |             | R.GVRLTELLK.Q             | 1028.64680 | 2 | 2.26 |
|    |                                                                               |             | R.GYLDKLEPSK.I            | 1149.61560 | 2 | 3.03 |
|    |                                                                               |             | R.GYLDKLEPSKITK.F         | 1491.84230 | 2 | 4.34 |
|    |                                                                               |             | R.LTELLK.Q                | 716.45580  | 2 | 2.31 |

|    |                                                                                    |             |                                     |            |   |      |
|----|------------------------------------------------------------------------------------|-------------|-------------------------------------|------------|---|------|
| 48 | dihydrolipoamide dehydrogenase                                                     | 0.51 ± 0.07 | K.AAQLGFK.T                         | 734.42010  | 2 | 2.35 |
|    |                                                                                    |             | K.ALTGGIAHLFK.Q                     | 1127.65770 | 2 | 3.39 |
|    |                                                                                    |             | K.NETLGGTCLNVGCIPSK.A               | 1819.92930 | 2 | 5.45 |
|    |                                                                                    |             | K.NQVTATTADGSTQVIGTK.N              | 1791.90880 | 2 | 6.61 |
|    |                                                                                    |             | R.GIEIPEVR.L                        | 912.51550  | 2 | 2.23 |
| 49 | Tu translation elongation factor, mitochondrial                                    | 0.52 ± 0.10 | K.FKKYEEIDNAPEER.A                  | 1767.85530 | 3 | 4.16 |
|    |                                                                                    |             | K.LLDAVDTYIPVPTR.D                  | 1572.86370 | 2 | 3.66 |
|    |                                                                                    |             | K.QIGVEHVVVYVVK.A                   | 1483.82730 | 2 | 2.87 |
|    |                                                                                    |             | R.AEAGDNLGALVR.G                    | 1185.62280 | 2 | 4.56 |
|    |                                                                                    |             | R.DKPHVNVGTIGHVDHGK.T               | 1809.93600 | 4 | 3.51 |
|    |                                                                                    |             | R.GITINAAHVEYSTAAR.H                | 1673.86110 | 2 | 5.27 |
|    |                                                                                    |             | R.GLVMVKPGSIQPHQK.V                 | 1634.90520 | 3 | 4.28 |
|    |                                                                                    |             | R.TVVTGIEMFHK.S                     | 1277.65640 | 2 | 3.65 |
| 50 | NADH dehydrogenase (ubiquinone) Fe-S protein 6                                     | 0.52 ± 0.11 | K.VYINLDK.E                         | 864.48310  | 2 | 2.54 |
|    |                                                                                    |             | K.VYINLDKETK.T                      | 1222.66830 | 2 | 4.06 |
|    |                                                                                    |             | R.IIACDGGGGALGHPK.V                 | 1422.74690 | 2 | 4.30 |
| 51 | 24-kDa subunit of mitochondrial NADH dehydrogenase                                 | 0.53 ± 0.12 | K.VAEVLQVPPMR.V                     | 1254.68800 | 2 | 3.44 |
|    |                                                                                    |             | R.AAAVLPVLDLAQR.Q                   | 1336.79530 | 2 | 4.29 |
|    |                                                                                    |             | R.DSDSILETLQR.K                     | 1276.63850 | 2 | 4.24 |
|    |                                                                                    |             | R.DSDSILETLQRK.L                    | 1404.73340 | 2 | 3.72 |
|    |                                                                                    |             | R.QNGWLPISAMNK.V                    | 1374.68400 | 2 | 4.12 |
|    |                                                                                    |             | R.VYEVAIFYTMYNR.K                   | 1672.76810 | 2 | 5.25 |
| 52 | 3-hydroxyisobutyrate dehydrogenase                                                 | 0.53 ± 0.09 | K.DLGLAQDSATSTK.T                   | 1306.64900 | 2 | 3.22 |
|    |                                                                                    |             | K.EAGEQVASSPADVAEK.A                | 1587.75020 | 2 | 4.97 |
|    |                                                                                    |             | K.EAGEQVASSPADVAEKADR.I             | 1929.91540 | 2 | 5.13 |
|    |                                                                                    |             | K.EFKEAGEQVASSPADVAEK.A             | 1991.95620 | 2 | 5.93 |
|    |                                                                                    |             | K.EVEKMGAVFMDAPVSGGVGA <sup>A</sup> | 2210.05850 | 3 | 4.65 |
|    |                                                                                    |             | K.GSLLIDSSTIDPSVSK.E                | 1618.85400 | 2 | 5.58 |
|    |                                                                                    |             | K.KGSLLIDSSTIDPSVSK.E               | 1746.94890 | 2 | 4.87 |
|    |                                                                                    |             | K.MGAVFMDAPVSGGVGAAR.S              | 1724.81000 | 2 | 5.79 |
|    |                                                                                    |             | K.TPILLGSVAHQIYR.M                  | 1567.89600 | 2 | 4.51 |
|    |                                                                                    |             | K.TPVGFIGLGNMGNPMK.N                | 1735.85110 | 2 | 5.15 |
| 53 | gamma actin-like protein                                                           | 0.53 ± 0.13 | K.SYELPDGQVITIGNER.F                | 1790.89250 | 2 | 4.93 |
|    |                                                                                    |             | R.AVFPSIVGR.P                       | 945.55220  | 2 | 2.27 |
|    |                                                                                    |             | R.AVFPSIVGRPR.H                     | 1198.70600 | 2 | 2.94 |
|    |                                                                                    |             | R.DLTDYLMK.I                        | 1014.48180 | 2 | 2.41 |
|    |                                                                                    |             | R.HQGVMVGMGQKDSYVGDEAQ              | 2539.16690 | 4 | 3.05 |
| 54 | Atp5c1 protein                                                                     | 0.54 ± 0.08 | K.EVMIVGIGEK.I                      | 1090.58180 | 2 | 3.02 |
|    |                                                                                    |             | K.HLIIGVSSDR.G                      | 1096.61150 | 2 | 3.29 |
|    |                                                                                    |             | K.NDMAALTAAGK.E                     | 1062.52540 | 2 | 3.74 |
|    |                                                                                    |             | K.QMKNDMAALTAAGK.E                  | 1465.71430 | 2 | 3.66 |
|    |                                                                                    |             | R.GLCGAIHSSVAK.Q                    | 1199.65120 | 2 | 4.22 |
|    |                                                                                    |             | R.THSDQFLVSFK.D                     | 1308.65880 | 2 | 4.01 |
|    |                                                                                    |             | R.VYGTGSLALYEK.A                    | 1300.67890 | 2 | 4.03 |
| 55 | ATP synthase, H <sup>+</sup> transporting, mitochondrial F1 complex, beta polypept | 0.54 ± 0.10 | K.AHGGYSVFAGVGER.T                  | 1406.68170 | 2 | 4.85 |
|    |                                                                                    |             | K.IGLFGGAGVGK.T                     | 975.56270  | 2 | 3.12 |
|    |                                                                                    |             | K.IPVGPETLGR.I                      | 1038.59480 | 2 | 2.86 |
|    |                                                                                    |             | K.TVLIMELINNVAK.A                   | 1473.83510 | 2 | 5.21 |
|    |                                                                                    |             | K.VALVYGMNEPPGAR.A                  | 1617.80590 | 2 | 4.75 |
|    |                                                                                    |             | K.VLDSGAPIKIPVGPETLGR.I             | 1919.09660 | 3 | 4.91 |
|    |                                                                                    |             | K.VVDLLAPYAK.G                      | 1088.63560 | 2 | 3.61 |
|    |                                                                                    |             | R.AIAELGIYPAVDPLDSTSR.I             | 1988.03400 | 3 | 5.34 |
|    |                                                                                    |             | R.EGNDLYHEMIESGVINLK.D              | 2076.99120 | 2 | 5.38 |

|           |                                                            |             |                           |            |   |      |
|-----------|------------------------------------------------------------|-------------|---------------------------|------------|---|------|
|           |                                                            |             | R.FLSQPFQVAEVFTGHMGK.L    | 2039.00600 | 2 | 4.84 |
|           |                                                            |             | R.FTQAGSEVSALLGR.I        | 1435.75450 | 2 | 5.26 |
|           |                                                            |             | R.IMDPNIVGSEHYDVAR.G      | 1831.86490 | 2 | 4.83 |
|           |                                                            |             | R.IMNVIGEPIDER.G          | 1401.70480 | 2 | 4.56 |
|           |                                                            |             | R.IPSAVGYQPTLATDMGMTQER.  | 2298.07460 | 3 | 5.67 |
|           |                                                            |             | R.LVLEVAQHLGESTVR.T       | 1650.91790 | 2 | 5.30 |
|           |                                                            |             | R.TIAMDGTEGLVR.G          | 1278.63640 | 2 | 3.64 |
|           |                                                            |             | R.TREGNDLYHEMIESGVINLK.D  | 2334.14000 | 3 | 5.45 |
|           |                                                            |             | R.VALTGLTVAEYFR.D         | 1439.78980 | 2 | 4.81 |
| <b>56</b> | <b>creatine kinase, sarcomeric mitochondrial precursor</b> | 0.54 ± 0.10 | K.HPTDLTASK.I             | 983.47980  | 2 | 2.22 |
|           |                                                            |             | R.EVENVAITALEGLK.G        | 1485.81640 | 2 | 4.84 |
|           |                                                            |             | R.VMKHPTDLTASK.I          | 1357.67860 | 2 | 3.50 |
| <b>57</b> | <b>propionyl-Coenzyme A carboxylase, alpha polypeptide</b> | 0.56 ± 0.18 | K.AGDTVGEGLLVELE.-        | 1516.73830 | 2 | 4.05 |
|           |                                                            |             | K.FLSDVYPDGFK.G           | 1287.62610 | 2 | 3.51 |
|           |                                                            |             | K.LAAELNKFMLEK.V          | 1422.76660 | 2 | 3.86 |
|           |                                                            |             | K.RMEDALDSYVIR.G          | 1483.72150 | 2 | 2.59 |
|           |                                                            |             | K.SFGLPSIGR.L             | 933.51580  | 2 | 2.13 |
|           |                                                            |             | R.DAGGNMSIQFLGTVYK.V      | 1716.82670 | 2 | 5.17 |
|           |                                                            |             | R.GVTHNIPLLR.E            | 1119.66380 | 2 | 3.19 |
|           |                                                            |             | R.MEDALDSYVIR.G           | 1327.62040 | 2 | 4.53 |
|           |                                                            |             | R.VPVIRPDVAK.W            | 1093.67340 | 2 | 3.19 |
| <b>58</b> | <b>Voltage-dependent anion-selective channel protein 1</b> | 0.56 ± 0.05 | K.LTFDSSFSPNTGK.K         | 1400.66980 | 2 | 4.37 |
|           |                                                            |             | K.LTFDSSFSPNTGKK.N        | 1528.76470 | 2 | 3.85 |
|           |                                                            |             | K.LTLSALLDGK.N            | 1030.61480 | 2 | 3.17 |
|           |                                                            |             | K.SENGLEFTSSGSANTETTK.V   | 1959.87830 | 2 | 5.06 |
|           |                                                            |             | K.TKSENGLEFTSSGSANTETTK.V | 2189.02100 | 3 | 4.57 |
|           |                                                            |             | K.YQVDPDACFSAK.V          | 1400.64620 | 2 | 4.46 |
|           |                                                            |             | R.VTQSNFAVGYK.T           | 1213.62170 | 2 | 3.92 |
| <b>59</b> | <b>cytochrome c-1</b>                                      | 0.57 ± 0.19 | R.AANNALPPDLSYIVR.A       | 1670.88660 | 2 | 2.29 |
|           |                                                            |             | R.GLLSSLDHTSIR.R          | 1298.70680 | 2 | 3.76 |
|           |                                                            |             | R.HLVGVICYTEEEAK.A        | 1534.75170 | 2 | 4.58 |
| <b>60</b> | <b>isocitrate dehydrogenase 3 (NAD+) alpha</b>             | 0.57 ± 0.07 | K.APIQWEER.N              | 1028.51650 | 2 | 3.04 |
|           |                                                            |             | K.CSDFTEEICR.R            | 1316.58620 | 2 | 3.91 |
|           |                                                            |             | K.IEAACFATIK.D            | 1123.61270 | 2 | 3.83 |
|           |                                                            |             | K.IEAACFATIKDGK.S         | 1423.75610 | 2 | 4.31 |
|           |                                                            |             | K.TPIAAGHPSMNLRLR.K       | 1606.87390 | 2 | 4.33 |
|           |                                                            |             | K.TPYTDVNIVTIR.E          | 1391.75350 | 2 | 4.21 |
|           |                                                            |             | K.WMIPPEAK.E              | 987.49730  | 2 | 2.46 |
|           |                                                            |             | R.IAEFAFEYAR.N            | 1216.60020 | 2 | 4.24 |
|           |                                                            |             | R.MSDGLFLQK.C             | 1054.52430 | 2 | 3.44 |
| <b>61</b> | <b>fumarate hydratase 1</b>                                | 0.58 ± 0.06 | K.KPVHPNDHVNK.S           | 1284.68130 | 2 | 3.80 |
|           |                                                            |             | K.LHDALSAK.S              | 854.47360  | 2 | 2.39 |
|           |                                                            |             | K.NVLHSAR.L               | 796.44300  | 2 | 2.23 |
|           |                                                            |             | K.RAAAEVNQEYGLDPK.I       | 1660.82950 | 3 | 4.24 |
|           |                                                            |             | K.SKEFAQVIK.I             | 1049.59950 | 3 | 3.22 |
|           |                                                            |             | K.VAALTGLPFVTAPNK.F       | 1498.86330 | 2 | 5.03 |
|           |                                                            |             | K.YYGAQTVR.S              | 957.47940  | 2 | 3.28 |
|           |                                                            |             | R.AAAEVNQEYGLDPK.I        | 1504.72840 | 2 | 5.04 |
|           |                                                            |             | R.AIEMLGELGSK.K           | 1204.62470 | 2 | 4.34 |
|           |                                                            |             | R.IEYDTFGELK.V            | 1214.59450 | 2 | 3.74 |
|           |                                                            |             | R.IYELAAGGTAVGTGLNTR.I    | 1763.92920 | 2 | 5.57 |
|           |                                                            |             | R.MPIPVIA.A               | 813.49080  | 2 | 2.19 |



|                |                                                       |             |                        |            |   |      |
|----------------|-------------------------------------------------------|-------------|------------------------|------------|---|------|
| 62             | glutamate oxaloacetate transaminase 2                 | 0.58 ± 0.07 | K.ASAELALGENSEVLK.S    | 1530.80150 | 2 | 5.14 |
|                |                                                       |             | K.EFSVYMTK.D           | 1020.47120 | 2 | 2.19 |
|                |                                                       |             | K.KMNLGVGAYR.D         | 1124.58860 | 2 | 2.82 |
|                |                                                       |             | K.MNLGVGAYR.D          | 996.49370  | 2 | 3.39 |
|                |                                                       |             | K.NMGLYGER.V           | 955.43070  | 2 | 3.05 |
|                |                                                       |             | R.DAGMQLQGYR.Y         | 1154.52640 | 2 | 4.07 |
|                |                                                       |             | R.DDNGKPYVLPVSR.K      | 1459.75450 | 2 | 2.84 |
|                |                                                       |             | R.FVTVQTISGTGALR.V     | 1449.80650 | 2 | 5.42 |
|                |                                                       |             | R.IAATILTSPDLR.K       | 1270.73710 | 2 | 4.24 |
|                |                                                       |             | R.PLYSNPPLNGAR.I       | 1298.68570 | 2 | 2.57 |
|                |                                                       |             | R.TQLVSNLK.K           | 902.53110  | 2 | 3.19 |
|                |                                                       |             | R.TQLVSNLKK.E          | 1030.62610 | 2 | 2.92 |
|                |                                                       |             | R.VGAFTVVCK.D          | 980.55440  | 2 | 3.54 |
|                |                                                       |             | R.VGASFLQR.F           | 877.48960  | 2 | 3.31 |
| 63             | NADH dehydrogenase (ubiquinone) flavoprotein 1        | 0.58 ± 0.08 | K.LVEGCLVGGR.A         | 1059.59260 | 2 | 3.85 |
|                |                                                       |             | K.YLVVNADEGEPGTCK.D    | 1651.79430 | 2 | 5.30 |
|                |                                                       |             | K.YLVVNADEGEPGTCKDR.E  | 1922.92230 | 2 | 5.18 |
|                |                                                       |             | R.AAYIYIR.G            | 869.48850  | 2 | 2.53 |
|                |                                                       |             | R.EAYEAGLIGK.N         | 1050.54710 | 2 | 2.70 |
|                |                                                       |             | R.GEFYNEASNLQVAIR.E    | 1710.84510 | 2 | 5.20 |
|                |                                                       |             | R.GGTWFAGFGR.E         | 1055.50630 | 2 | 2.84 |
|                |                                                       |             | R.HDPHKLVEGCLVGGR.A    | 1673.88510 | 3 | 4.79 |
|                |                                                       |             | R.HFRPELEDR.M          | 1198.59690 | 3 | 2.60 |
|                |                                                       |             | R.LIEFYK.H             | 812.45580  | 2 | 2.27 |
| 64             | lysophospholipase 1                                   | 0.59 ± 0.08 | K.ALIDQEVK.N           | 915.51510  | 2 | 2.45 |
|                |                                                       |             | K.GLVNPANVTFK.V        | 1159.64750 | 2 | 2.91 |
|                |                                                       |             | K.VYEGMMHSSCQQEMMDVK.Y | 2253.88990 | 3 | 3.94 |
|                |                                                       |             | R.ASFSQGPINSANR.D      | 1348.66090 | 2 | 4.29 |
| 65             | tropomyosin 4                                         | 0.60 ± 0.13 | K.ATDAEADVASLNR.R      | 1332.63950 | 2 | 4.80 |
|                |                                                       |             | K.ATDAEADVASLNR.I      | 1488.74070 | 2 | 2.42 |
|                |                                                       |             | K.KATDAEADVASLNR.R     | 1460.73450 | 2 | 4.91 |
|                |                                                       |             | K.KATDAEADVASLNR.I     | 1616.83560 | 2 | 2.95 |
| 66             | ubiquinol-cytochrome c reductase binding protein      | 0.60 ± 0.07 | K.LGLMRDDTMHETEDVK.E   | 1921.86350 | 2 | 3.08 |
|                |                                                       |             | K.WYYNAAGFNK.L         | 1233.56930 | 2 | 3.52 |
|                |                                                       |             | R.ALDLSMR.H            | 805.42420  | 2 | 2.20 |
|                |                                                       |             | R.DDTMHETEDVKEAIR.R    | 1804.80230 | 2 | 4.05 |
|                |                                                       |             | R.DDTMHETEDVK.E        | 1319.54250 | 2 | 3.03 |
|                |                                                       |             | R.LPENLYNDR.M          | 1133.55910 | 2 | 3.34 |
|                |                                                       |             | R.RLPENLYNDR.M         | 1289.66020 | 2 | 3.44 |
| 67             | NADH dehydrogenase 1 alpha subcomplex 10-like protein | 0.60 ± 0.06 | K.VVEDIEYLNYNK.G       | 1498.74290 | 2 | 4.95 |
|                |                                                       |             | K.YAPGYNADVGDK.W       | 1269.57520 | 2 | 2.63 |
|                |                                                       |             | R.DIAEQLGMK.H          | 1020.50360 | 2 | 3.23 |
|                |                                                       |             | R.VITVDGNICSGK.N       | 1262.67200 | 2 | 4.00 |
|                |                                                       |             | R.YGLLASILGDK.T        | 1149.65190 | 2 | 3.86 |
| 68             | methylmalonate semialdehyde dehydrogenase gene        | 0.62 ± 0.08 | K.DMDLYSYR.L           | 1078.45150 | 2 | 3.25 |
|                |                                                       |             | K.TLADAEGDVFR.G        | 1193.58020 | 2 | 3.88 |
|                |                                                       |             | R.VPGATMLLAK.L         | 1016.58140 | 2 | 3.15 |
|                |                                                       |             | R.VPQSTKAEMEAAVAACK.R  | 1806.90350 | 3 | 2.97 |
|                |                                                       |             | R.VPQSTKAEMEAAVAACKR.A | 1963.00460 | 3 | 4.00 |
| R.YQQLIKENLK.E | 1276.72650                                            | 2           | 3.43                   |            |   |      |
| 69             | cytochrome c oxidase, subunit Va                      | 0.64 ± 0.07 | K.GMNTLVGYDLVPEPK.I    | 1648.82560 | 2 | 4.56 |
|                |                                                       |             | R.KGMNTLVGYDLVPEPK.I   | 1776.92060 | 3 | 4.04 |
|                |                                                       |             | R.LNDFASAVR.I          | 992.51650  | 2 | 3.21 |
|                |                                                       |             | R.RLNDFASAVR.I         | 1148.61760 | 2 | 3.43 |

|    |                                                               |             |                         |            |   |      |
|----|---------------------------------------------------------------|-------------|-------------------------|------------|---|------|
| 70 | <b>NADH dehydrogenase (ubiquinone) Fe-S protein 2</b>         | 0.66 ± 0.14 | K.APGFAHLAGLDK.M        | 1196.64280 | 2 | 4.00 |
|    |                                                               |             | K.GEFGVYLVSDGSSR.P      | 1472.70210 | 2 | 4.88 |
|    |                                                               |             | K.TSMESLIHHFK.L         | 1345.65740 | 2 | 3.25 |
|    |                                                               |             | R.IIEQCLNK.M            | 1017.57080 | 2 | 3.53 |
| 71 | <b>Mitochondrial H<sup>+</sup>-ATP synthase alpha subunit</b> | 0.67 ± 0.11 | K.AVDSLVIPIGR.G         | 1026.59480 | 2 | 2.90 |
|    |                                                               |             | K.LIKEGDIVKR.T          | 1170.72100 | 2 | 3.10 |
|    |                                                               |             | K.TGTAEMSSILEER.I       | 1439.66880 | 2 | 4.03 |
|    |                                                               |             | K.TSIAIDTIINQK.R        | 1316.74260 | 2 | 4.32 |
|    |                                                               |             | R.ILGADTSVDLEETGR.V     | 1575.78660 | 2 | 5.33 |
|    |                                                               |             | R.ISVREPMQTGIK.A        | 1374.74150 | 2 | 2.96 |
|    |                                                               |             | R.TGAIVDVPVGDPELLGR.V   | 1610.87540 | 2 | 4.35 |
|    |                                                               |             | R.VGLKAPGIIPR.I         | 1120.72060 | 2 | 3.33 |
|    |                                                               |             | R.VLSIGDGIAR.V          | 1000.57910 | 2 | 3.23 |
|    |                                                               |             | R.VVDALGNAIDGK.G        | 1171.63230 | 2 | 4.45 |
|    |                                                               |             | R.VVDALGNAIDGKGPVGSK.I  | 1696.92340 | 2 | 5.00 |
| 72 | <b>hydroxyacyl dehydrogenase, subunit B</b>                   | 0.70 ± 0.12 | K.DNGIRPSSLEQMAK.L      | 1561.76440 | 3 | 3.16 |
|    |                                                               |             | K.DQLLLGPTYATPK.V       | 1416.77390 | 2 | 3.47 |
|    |                                                               |             | K.VGAPPLEK.F            | 810.47250  | 2 | 2.50 |
|    |                                                               |             | R.ALAMGYKPK.A           | 994.53950  | 2 | 2.47 |
|    |                                                               |             | R.DFIYVSQDPK.D          | 1211.59480 | 2 | 3.99 |
|    |                                                               |             | R.LAAAFVSR.M            | 905.52090  | 2 | 3.75 |
| 73 | <b>citrate synthase</b>                                       | 0.71 ± 0.08 | R.FRGYSIPECQK.L         | 1384.69890 | 2 | 4.12 |
|    |                                                               |             | K.TVVGQITVDMMYGGMR.G    | 1805.82360 | 2 | 5.54 |
|    |                                                               |             | K.GLVYETSVLDPDEGIR.F    | 1762.88630 | 2 | 4.81 |
| 74 | <b>inner membrane protein</b>                                 | 0.73 ± 0.14 | K.AVDEAADALLK.A         | 1115.59480 | 2 | 3.39 |
|    |                                                               |             | K.FEFEQDLSEK.L          | 1271.57960 | 2 | 3.75 |
|    |                                                               |             | K.FVNQLKGESR.R          | 1177.63290 | 2 | 2.72 |
|    |                                                               |             | K.LHSMIVDLDSVVK.K       | 1471.78300 | 2 | 4.71 |
|    |                                                               |             | K.LHSMIVDLDSVVKK.V      | 1599.87800 | 3 | 4.29 |
|    |                                                               |             | K.SLEDALNQTATVTR.Q      | 1518.77640 | 2 | 5.08 |
|    |                                                               |             | K.TSSAEMPTIPLGSAVEAIR.V | 1945.99040 | 2 | 4.84 |
|    |                                                               |             | K.VVSQYHELVVQAR.D       | 1527.82830 | 2 | 4.72 |
|    |                                                               |             | R.EIAGATPYITAAEEK.L     | 1563.79060 | 2 | 3.85 |
|    |                                                               |             | R.GVYSEETLR.A           | 1053.52170 | 2 | 3.37 |
|    |                                                               |             | R.KAVDEAADALLK.A        | 1243.68980 | 2 | 4.62 |
|    |                                                               |             | R.QTITAQNAAVQAVK.A      | 1442.79670 | 2 | 4.70 |
|    |                                                               |             | R.RKAVDEAADALLK.A       | 1399.79090 | 3 | 4.15 |
| 75 | <b>ubiquinol-cytochrome c reductase core protein 1</b>        | 0.76 ± 0.16 | K.EVESIGAHLNAYSTR.E     | 1646.81380 | 2 | 4.58 |
|    |                                                               |             | K.NNGAGYFLEHLAFK.G      | 1580.78610 | 2 | 2.85 |
|    |                                                               |             | R.IEEVDAQMVR.E          | 1205.58360 | 2 | 3.93 |
|    |                                                               |             | R.IPLAEWESR.I           | 1100.57400 | 2 | 3.08 |
|    |                                                               |             | R.NALISHLDGTTVCEDIGR.S  | 2068.04390 | 3 | 3.53 |
|    |                                                               |             | R.RIPLAEWESR.I          | 1256.67510 | 2 | 3.25 |
|    |                                                               |             | R.SGMFWLR.F             | 912.44020  | 2 | 2.88 |
|    |                                                               |             | R.TDLTDYLSR.H           | 1083.53220 | 2 | 3.54 |
| 76 | <b>enolase 3, beta; Muscle specific enolase</b>               | 0.77 ± 0.14 | K.FMIELDGTENK.S         | 1312.60950 | 2 | 3.66 |
|    |                                                               |             | K.TLGPALLEK.K           | 941.56720  | 2 | 2.63 |
|    |                                                               |             | K.TLGPALLEK.L           | 1069.66210 | 2 | 2.51 |
|    |                                                               |             | K.VVIGMDVAASEFYR.N      | 1572.77320 | 2 | 4.55 |
| 77 | <b>Electron transfer flavoprotein alpha-subunit</b>           | 0.79 ± 0.20 | K.CDKVVQDLCK.V          | 1264.66400 | 2 | 3.52 |
|    |                                                               |             | K.LNVAPVSDIIEIK.S       | 1410.82080 | 2 | 4.14 |
|    |                                                               |             | K.VKVFSVR.G             | 834.52010  | 2 | 2.07 |
|    |                                                               |             | K.VVPEMTEILKK.K         | 1302.73430 | 2 | 2.06 |

|    |                                               |             |                         |            |   |      |
|----|-----------------------------------------------|-------------|-------------------------|------------|---|------|
|    |                                               |             | R.AAVDAGFVPNDMQVGQTGK.I | 1920.91250 | 2 | 5.24 |
|    |                                               |             | R.GTSFEAAAASGGASSEK.A   | 1614.72470 | 2 | 5.43 |
|    |                                               |             | R.LGGEVSCLVAGTK.C       | 1290.70330 | 2 | 5.12 |
|    |                                               |             | R.TIYAGNALCTVK.C        | 1310.70840 | 2 | 4.24 |
| 78 | MD-1 [Rattus norvegicus]                      | 0.79 ± 0.11 | R.KLFLDIAFVAK.G         | 1264.76690 | 2 | 2.77 |
| 79 | isovaleryl Coenzyme A dehydrogenase           | 0.85 ± 0.17 | K.AQEIDQSNDFK.N         | 1294.59150 | 2 | 3.69 |
|    |                                               |             | K.FVQENLAPK.A           | 1045.56820 | 2 | 3.50 |
|    |                                               |             | K.GVYVLMISGLDLER.L      | 1467.75170 | 2 | 4.36 |
|    |                                               |             | K.IGQFQLMQGK.M          | 1165.60390 | 2 | 4.07 |
|    |                                               |             | K.LYEIGGGTSEVR.R        | 1280.64870 | 2 | 4.17 |
|    |                                               |             | K.LYEIGGGTSEVRR.L       | 1436.74980 | 2 | 2.19 |
|    |                                               |             | K.TDLTAVPASR.G          | 1030.55330 | 2 | 3.01 |
|    |                                               |             | K.VPAANILSQESK.G        | 1256.68500 | 2 | 4.33 |
|    |                                               |             | R.AFNADFR.-             | 840.40040  | 2 | 2.71 |
|    |                                               |             | R.GITAFIVEK.D           | 977.56720  | 2 | 3.05 |
|    |                                               |             | R.GITAFIVEKDMPGFSTSK.K  | 1943.97880 | 2 | 4.66 |
| 80 | voltage-dependent anion channel 2             | 0.86 ± 0.15 | K.LTFDITTFSPNTGK.K      | 1428.70110 | 2 | 4.28 |
|    |                                               |             | K.LTLSALVDGK.S          | 1016.59920 | 2 | 3.16 |
|    |                                               |             | K.SCSGVEFSTSGSSNTDTGK.V | 1907.82340 | 2 | 6.18 |
|    |                                               |             | K.YQLDPTASISAK.V        | 1293.66910 | 2 | 3.92 |
|    |                                               |             | R.SNFAVGYR.T            | 913.45320  | 2 | 2.52 |
| 81 | dihydrolipoamide acetyltransferase            | 0.87 ± 0.15 | K.GFDVASVMSVTLSCDHR.V   | 1896.88890 | 2 | 3.59 |
|    |                                               |             | K.GKISVNDFIK.A          | 1233.72070 | 2 | 3.45 |
|    |                                               |             | K.GLETIASDVVSLASK.A     | 1489.81140 | 2 | 5.02 |
|    |                                               |             | K.ISVNDFIK.A            | 1048.60430 | 2 | 2.37 |
|    |                                               |             | K.VPEANSSWMDTVIR.Q      | 1620.76920 | 2 | 4.16 |
|    |                                               |             | K.YLEKPVTMLL.-          | 1222.67570 | 2 | 2.80 |
| 82 | short chain acyl-coenzyme A dehydrogenase     | 0.88 ± 0.23 | K.EHLFPTSQVK.K          | 1185.62680 | 2 | 2.14 |
|    |                                               |             | K.ENLLGEPGMGFK.I        | 1307.63050 | 2 | 2.75 |
|    |                                               |             | K.LADMALALESAR.L        | 1276.65710 | 2 | 4.80 |
|    |                                               |             | R.ASTANLIFEDCR.I        | 1483.71560 | 2 | 4.12 |
|    |                                               |             | R.ITEIYEGTSEIQR.L       | 1538.77020 | 2 | 4.82 |
|    |                                               |             | R.LVIAGHLLR.S           | 991.64170  | 2 | 3.11 |
| 83 | dnaK-type molecular chaperone grp75 precursor | 0.89 ± 0.16 | K.DAGQISGLNVLR.V        | 1242.68060 | 2 | 4.57 |
|    |                                               |             | K.LFEMAYK.K             | 917.44420  | 2 | 2.68 |
|    |                                               |             | K.LFEMAYKK.M            | 1045.53920 | 2 | 2.08 |
|    |                                               |             | K.MKETAENYLGHTAK.N      | 1608.76920 | 3 | 4.76 |
|    |                                               |             | K.SDIGEVILVGGMTR.M      | 1462.75750 | 2 | 4.38 |
|    |                                               |             | K.VQQTVDLDFGR.A         | 1290.68060 | 2 | 4.24 |
|    |                                               |             | R.ASNGDAWVEAHGK.L       | 1341.61870 | 2 | 2.49 |
|    |                                               |             | R.ETGVDLTKDNMALQR.V     | 1706.83830 | 2 | 3.56 |
|    |                                               |             | R.QAASSLQQASLK.L        | 1231.66460 | 2 | 3.69 |
|    |                                               |             | R.QAVTNPNTFYATK.R       | 1568.77090 | 2 | 4.12 |
|    |                                               |             | R.QAVTNPNTFYATKR.L      | 1724.87200 | 3 | 2.72 |
|    |                                               |             | R.TTPSVVAFTPDGER.L      | 1476.73340 | 2 | 3.99 |
| 84 | acetyl-coenzyme A acetyltransferase 1         | 0.90 ± 0.14 | K.AGIPKEEVK.E           | 970.55730  | 2 | 2.88 |
|    |                                               |             | K.DGLTDVYNK.I           | 1024.49510 | 2 | 3.33 |
|    |                                               |             | K.EVYMGNVIQGGEGQAPTR.Q  | 1921.90780 | 2 | 5.38 |
|    |                                               |             | K.GKPDVVVK.E            | 841.51470  | 2 | 2.14 |
|    |                                               |             | K.IHMGNCAENTAK.K        | 1361.62470 | 2 | 3.50 |
|    |                                               |             | K.LEDLIVK.D             | 829.50350  | 2 | 2.53 |
|    |                                               |             | K.LGTIAIQGAIEK.A        | 1213.71560 | 2 | 3.93 |
|    |                                               |             | K.YAIGSYTR.S            | 930.46850  | 2 | 2.63 |
|    |                                               |             | R.SKEAWDAGK.F           | 991.48490  | 2 | 3.25 |

|                     |                                                         |             |                       |                                       |             |                    |
|---------------------|---------------------------------------------------------|-------------|-----------------------|---------------------------------------|-------------|--------------------|
| 85                  | Ubiquinol-cytochrome C reductase complex core protein 2 | 0.90 ± 0.28 | K.AVAQGNLSSADVQAAK.N  | 1529.79240                            | 2           | 5.43               |
|                     |                                                         |             | R.GNNTTSLLSQSVAK.G    | 1419.74                               | 2           | 4.19               |
| 86                  | cytochrome c oxidase, subunit VIa, polypeptide 2        | 1.03 ± 0.23 | K.GDHGGAGANTWR.L      | 1198.53540                            | 2           | 3.40               |
| 87                  | mitochondrial aldehyde dehydrogenase                    | 1.13 ± 0.16 | K.EEIFGPVMQILK.F      | 1419.75570                            | 2           | 3.57               |
|                     |                                                         |             | K.FKTIEEVVGR.A        | 1177.65810                            | 2           | 3.44               |
|                     |                                                         |             | K.LGPALATGNVVVMK.V    | 1385.78260                            | 2           | 4.38               |
|                     |                                                         |             | K.TIPIDGDFFSYTR.H     | 1531.74330                            | 2           | 2.81               |
|                     |                                                         |             | K.VAEQTPLTALYVANLIK.E | 1844.05330                            | 2           | 5.35               |
|                     |                                                         |             | K.YGLAAAVFTK.D        | 1040.57810                            | 2           | 4.02               |
|                     |                                                         |             | R.ELGEYGLQAYTEVK.T    | 1599.79060                            | 2           | 4.98               |
|                     |                                                         |             | R.GYFIQPTVFGDVK.D     | 1470.76330                            | 2           | 4.09               |
|                     |                                                         |             | R.TEQGPQVDETQFK.K     | 1506.70760                            | 2           | 4.72               |
|                     |                                                         |             | R.TEQGPQVDETQFKK.I    | 1634.80260                            | 2           | 4.54               |
|                     |                                                         |             | R.TFVQEDVYDEFVER.S    | 1775.81280                            | 2           | 5.60               |
|                     |                                                         |             | R.VVGNPFDSR.T         | 990.50090                             | 2           | 3.03               |
|                     |                                                         |             | 88                    | Parvalbumin (calcium binding protein) | 1.30 ± 0.48 | K.AIGAFTAADSFDHK.K |
| K.AIGAFTAADSFDHKK.F | 1578.79160                                              | 2           |                       |                                       |             | 4.69               |
| K.FFQMVGLK.K        | 985.51810                                               | 2           |                       |                                       |             | 2.61               |
| K.KFFQMVGLK.K       | 1113.61300                                              | 2           |                       |                                       |             | 2.45               |
| K.VFHILDKDK.S       | 1114.62610                                              | 2           |                       |                                       |             | 3.11               |
| 89                  | heatshockprotein,mitochondrialprecursor(Hsp60)          | 1.33 ± 0.37 | K.DRVTDALNATR.A       | 1231.63950                            | 2           | 3.88               |
|                     |                                                         |             | K.IGIEIIR             | 785.51370                             | 2           | 2.68               |
|                     |                                                         |             | K.IGIEIIR.A           | 941.61480                             | 2           | 3.13               |
|                     |                                                         |             | K.LSDGVAVLK.V         | 901.53590                             | 2           | 3.50               |
|                     |                                                         |             | K.SIDLKDKYK.N         | 1109.62060                            | 2           | 2.84               |
|                     |                                                         |             | K.VGLQVVAVK.A         | 912.58820                             | 2           | 3.49               |
|                     |                                                         |             | R.GYISPYFINTSK.G      | 1389.70540                            | 2           | 4.07               |
| 90                  | dihydrolipoamide branched chain transacylase E2         | 1.46 ± 0.42 | K.AQIMNVSWADHR.V      | 1530.71230                            | 2           | 3.90               |
|                     |                                                         |             | K.LREELKPVALAR.G      | 1394.84840                            | 2           | 3.48               |
|                     |                                                         |             | K.LSFMPFFLK.A         | 1145.60690                            | 2           | 3.09               |
|                     |                                                         |             | K.QTGAILPPSPK.S       | 1108.63660                            | 2           | 2.29               |
|                     |                                                         |             | R.ILKEDILNFLEK.Q      | 1474.85210                            | 2           | 4.35               |
|                     |                                                         |             | R.SVFEIAMELNR.L       | 1324.65710                            | 2           | 3.68               |
| 91                  | hypothetical protein FLJ10759                           | 1.63 ± 0.41 | K.GKNSQPLLLVGPDSEQA.- | 1752.91320                            | 2           | 4.26               |
|                     |                                                         |             | K.ILEAHVEAKEPR.A      | 1391.76470                            | 3           | 2.80               |
|                     |                                                         |             | K.NSQPLLLVGPDSEQA.-   | 1567.79680                            | 2           | 3.24               |
|                     |                                                         |             | K.SVAVLEHQLVEVEETVR.Q | 1937.03440                            | 2           | 5.84               |
|                     |                                                         |             | K.VLEEVADKPQTEFLMK.F  | 1892.96790                            | 2           | 5.03               |
|                     |                                                         |             | R.ELSSLNSYLEQLR.Q     | 1551.80190                            | 2           | 4.49               |
|                     |                                                         |             | R.MFLAALESSLDR.E      | 1368.68330                            | 2           | 4.35               |
|                     |                                                         |             | R.WALGVMAADASR.R      | 1263.61560                            | 2           | 4.00               |
