# Supplementary material
Source: PubMed Central journal article supplement (PMC2584812)
Supplement: 90586.2008_2.pdf [file 90586.2008_2.pdf]

Table S2. Skeletal muscle proteins separated and purified by 2DGE and identified by tandem mass spectrometry

Mitochondrial fraction of rat quadriceps muscles were prepared by differential centrifugation as described in the Methods. The mitochondrial pellets were used to perform 2DGE for protein purification. The protein serial number sequence is according to Figures 1 and 4. Proteins were identified by tandem mass spectrometry followed by Sequest database search. Proteins are listed with their identification parameters such as accession number, % amino acid (AA) coverage, sequest score and number of specific peptides obtained along with their sub-cellular location and function.

| No | Protein name                                              | Accession no | % AA coverage | Sequest Score | Unique Peptides | Subcellular location                      | Protein function                                                                                          |
|----|-----------------------------------------------------------|--------------|---------------|---------------|-----------------|-------------------------------------------|-----------------------------------------------------------------------------------------------------------|
| 1  | myosin heavy chain, skeletal muscle, adult 1              | 34870884     | 13.55         | 234.32        | 23              | cytoskeleton                              | muscle contraction                                                                                        |
| 2  | myosin, light polypeptide 2                               | 6981238      | 45.72         | 90.25         | 9               | cytoskeleton                              | actin-dependent ATPase activity, calcium ion binding, motor activity                                      |
| 3  | tropomodulin 4                                            | 34858039     | 15.94         | 60.25         | 6               | cytoskeleton                              | muscle contraction                                                                                        |
| 4  | creatine kinase, muscle form                              | 6978661      | 28.28         | 138.25        | 13              | cytoplasm                                 | reversibly catalyzes the transfer of phosphate between ATP and various phosphogens                        |
| 5  | Troponin C, skeletal muscle                               | 34860691     | 30.90         | 40.26         | 4               | cytoskeleton                              | regulation of muscle contraction                                                                          |
| 6  | leucine zipper-EF-hand containing transmembrane protein 1 | 34878524     | 10.28         | 70.28         | 7               | mitochondrion, plasma membrane            | signal transduction, development                                                                          |
| 7  | 3-hydroxyacyl-CoA dehydrogenase type II                   | 7387724      | 30.33         | 70.30         | 6               | cytoplasm, mitochondrion, plasma membrane | lipid metabolism                                                                                          |
| 8  | coiled-coil-helix-coiled-coil-helixdomaincontaining3      | 34855114     | 21.54         | 80.27         | 8               | mitochondrion                             | protein binding                                                                                           |
| 9  | NAD <sup>+</sup> -isocitrate dehydrogenase, gamma subunit | 414185       | 9.52          | 48.20         | 4               | mitochondrion                             | carbohydrate metabolism, tricarboxylic acid cycle                                                         |
| 10 | pyruvate dehydrogenase (lipoamide) beta                   | 34869518     | 27.21         | 90.29         | 9               | mitochondrion,                            | glucose metabolism, glycolysis, tricarboxylic acid cycle                                                  |
| 11 | striated muscle alpha tropomyosin                         | 57406        | 35.26         | 70.25         | 7               | cytoskeleton                              | cell motility, regulation of muscle contraction, regulation of heart contraction, fatty acid biosynthesis |

|    |                                                                    |          |       |        |    |                                         |                                                                                                                                                                     |
|----|--------------------------------------------------------------------|----------|-------|--------|----|-----------------------------------------|---------------------------------------------------------------------------------------------------------------------------------------------------------------------|
| 12 | KCRS_RAT creatine kinase, sarcomeric mitochondrial precursor       | 125313   | 11.10 | 80.22  | 7  | mitochondrion                           | generation of precursor metabolites and energy, muscle contraction                                                                                                  |
| 13 | cytochrome c oxidase subunit Vb                                    | 16758362 | 21.86 | 30.18  | 3  | mitochondrial envelope                  | electron transport, respiratory gaseous exchange                                                                                                                    |
| 14 | Troponin T, fast skeletal muscle isoforms beta/alpha               | 136385   | 9.99  | 40.25  | 7  | cytoskeleton                            | regulation of striated muscle contraction                                                                                                                           |
| 15 | ubiquinol-cytochrome c reductase, Rieske iron-sulfur polypeptide 1 | 34875396 | 9.25  | 30.26  | 3  | mitochondrion, membrane                 | electron transport, transcription, regulation of transcription-DNA-dependent, ATP synthesis coupled proton transport, transcription from RNA polymerase II promoter |
| 16 | hypothetical protein MGC36907                                      | 34868312 | 4.08  | 10.22  | 1  |                                         |                                                                                                                                                                     |
| 17 | complement component 1 Q subcomponent-binding protein              | 34870494 | 5.38  | 10.24  | 1  | mitochondrial matrix                    | immune response                                                                                                                                                     |
| 18 | DNA segment, Chr 10, Johns Hopkins University 81 expressed         | 27705010 | 24.22 | 60.24  | 6  | cell wall, mitochondrion                | protein binding                                                                                                                                                     |
| 19 | prohibitin                                                         | 34851184 | 47.23 | 110.28 | 11 | nucleus, mitochondrial inner membrane,  | regulation of progression through cell cycle, DNA replication, signal transduction, histone deacetylation, regulation of apoptosis                                  |
| 20 | acyl-Coenzyme A dehydrogenase, very long chain                     | 6978435  | 6.66  | 50.28  | 5  | mitochondrion                           | electron transport, lipid metabolism, fatty acid metabolism, fatty acid beta-oxidation, energy derivation by oxidation of organic compounds                         |
| 21 | malate dehydrogenase 2                                             | 13592145 | 37.39 | 120.27 | 11 | mitochondrion, mitochondrial matrix     | glycolysis, tricarboxylic acid cycle, malate metabolism, tricarboxylic acid cycle intermediate metabolism                                                           |
| 22 | LRP16 protein                                                      | 21326475 | 4.2   | 10.19  | 2  | mitochondrion                           | may play a role in cell proliferation                                                                                                                               |
| 23 | pyruvate dehydrogenase (lipoamide) alpha 1                         | 34880551 | 21.09 | 80.22  | 8  | extracellular space, mitochondrion      | acetyl-CoA metabolism, glycolysis                                                                                                                                   |
| 24 | calreticulin                                                       | 11693172 | 15.5  | 60.31  | 6  | endoplasmic reticulum, cytosol, nucleus | regulation of transcription, protein folding, protein export from nucleus, calcium ion homeostasis, regulation of apoptosis                                         |
| 25 | NADP+-specific isocitrate dehydrogenase                            | 34857317 | 39.01 | 70.26  | 6  | mitochondrion                           | role in intermediary metabolism and energy production, carbohydrate metabolic process                                                                               |
| 26 | heat shock cognate 71 kDa protein                                  | 34876476 | 9.72  | 50.24  | 5  | cytoplasm                               | chaperone, response to unfolded protein, protein binding                                                                                                            |
| 27 | NAD+-specific isocitrate dehydrogenase b subunit                   | 34858691 | 19.73 | 80.23  | 8  | mitochondrion                           | tricarboxylic acid cycle, isocitrate metabolism                                                                                                                     |

|    |                                                                      |          |       |        |    |                                             |                                                                                                                                                                  |
|----|----------------------------------------------------------------------|----------|-------|--------|----|---------------------------------------------|------------------------------------------------------------------------------------------------------------------------------------------------------------------|
| 28 | ATP synthase subunit d                                               | 9506411  | 29.06 | 50.24  | 5  | mitochondrion                               | ion transport, ATP synthesis coupled proton transport                                                                                                            |
| 29 | peroxiredoxin 5 precursor                                            | 16758404 | 14.35 | 40.21  | 4  | mitochondrion, peroxisome                   | inflammatory response, response to oxidative stress                                                                                                              |
| 30 | hydroxyacyl-Coenzyme A dehydrogenase                                 | 18677763 | 12.50 | 90.27  | 9  | mitochondrion                               | lipid metabolism, fatty acid metabolism, fatty acid beta-oxidation                                                                                               |
| 31 | mitochondrial aconitase                                              | 38541404 | 22.43 | 160.27 | 15 | mitochondrion                               | generation of precursor metabolites and energy, tricarboxylic acid cycle, citrate metabolism                                                                     |
| 32 | unnamed protein product                                              | 56691    | 27.60 | 70.26  | 7  | mitochondrion                               | age-dependent response to reactive oxygen species, regulation of transcription from RNA polymerase II promoter, superoxide metabolism, cellular defense response |
| 33 | myosin, light polypeptide 3                                          | 6981240  | 38.38 | 60.26  | 6  | cytoskeleton                                | muscle contraction                                                                                                                                               |
| 34 | Succinyl-Co A ligase beta-chain, mitochondrial                       | 34874487 | 11.02 | 40.29  | 4  | mitochondrion                               | carbohydrate metabolism; tricarboxylic acid cycle                                                                                                                |
| 35 | prolyl 4-hydroxylase, beta polypeptide                               | 6981324  | 29.29 | 160.29 | 16 | extracellular region, endoplasmic reticulum | protein folding, peptidyl-proline hydroxylation to 4-hydroxy-L-proline                                                                                           |
| 36 | electron-transfer-flavoprotein, beta polypeptide                     | 27731305 | 12.58 | 30.18  | 3  | mitochondrial matrix                        | electron transport                                                                                                                                               |
| 37 | NADH dehydrogenase (ubiquinone) 1 beta subcomplex, 10, 22kD          | 27667934 | 34.68 | 70.20  | 7  | mitochondrial inner membrane                | transfer of electrons from NADH to the respiratory chain.                                                                                                        |
| 38 | Polymerase (RNA) II (DNA directed) polypeptide C                     | 34851240 | 10.94 | 30.26  | 3  | nucleus                                     | transcription, transcription from RNA polymerase II promoter                                                                                                     |
| 39 | Dihydrolipoamide succinyltransferase                                 | 266684   | 3.07  | 10.24  | 3  | mitochondrion                               | generation of precursor metabolites and energy, tricarboxylic acid cycle, metabolism                                                                             |
| 40 | alpha 1 actin precursor                                              | 4501881  | 12.9  | 40.32  | 4  | cytoskeleton                                | muscle thin filament assembly, skeletal muscle fiber development                                                                                                 |
| 41 | 3-mercaptopyruvate sulfurtransferase                                 | 20304123 | 4.33  | 10.23  | 1  | mitochondrial matrix                        | sulfate transport, cyanate catabolism, response to toxin                                                                                                         |
| 42 | acetyl-Coenzyme A dehydrogenase, long-chain                          | 6978431  | 14.56 | 50.31  | 5  | mitochondrion                               | electron transport, lipid metabolism, fatty acid metabolism                                                                                                      |
| 43 | ATPase, Ca <sup>++</sup> transporting, cardiac muscle, fast twitch 1 | 17157987 | 20.90 | 90.22  | 9  | smooth endoplasmic reticulum                | cation transport, calcium ion transport, regulation of striated muscle contraction, proton transport                                                             |

|    |                                                                                    |          |       |        |    |                                      |                                                                                                                         |
|----|------------------------------------------------------------------------------------|----------|-------|--------|----|--------------------------------------|-------------------------------------------------------------------------------------------------------------------------|
| 44 | enoyl Coenzyme A hydratase, short chain 1                                          | 17530977 | 21.97 | 70.25  | 7  | mitochondrion                        | generation of precursor metabolites and energy, lipid metabolism, fatty acid metabolism, fatty acid beta-oxidation      |
| 45 | ATP synthase, H <sup>+</sup> transporting, mitochondrial F1 complex, delta subunit | 20806153 | 13.32 | 20.24  | 2  | mitochondrion, membrane fraction     | ion transport, ATP synthesis coupled proton transport, proton transport, ATP biosynthesis                               |
| 46 | fast myosin alkali light chain                                                     | 13487933 | 37.56 | 50.23  | 7  | cytoskeleton                         | muscle development                                                                                                      |
| 47 | H(+)-transporting ATP synthase                                                     | 57029    | 22.78 | 78.22  | 8  | mitochondrion, membrane fraction     | ion transport, ATP synthesis coupled proton transport, proton transport, ATP biosynthesis                               |
| 48 | dihydrolipoamide dehydrogenase                                                     | 27717159 | 11.47 | 50.33  | 5  | cytoplasm, mitochondrion             | electron transport                                                                                                      |
| 49 | Tu translation elongation factor, mitochondrial                                    | 34859187 | 24.73 | 80.26  | 8  | mitochondrion, membrane              | protein biosynthesis, translational elongation, transport ,                                                             |
| 50 | NADH dehydrogenase (ubiquinone) Fe-S protein 6                                     | 9506913  | 20.11 | 30.22  | 3  | mitochondrion                        | mitochondrial electron transport- NADH to ubiquinone                                                                    |
| 51 | 24-kDa subunit of mitochondrial NADH dehydrogenase                                 | 34877948 | 25.29 | 60.26  | 6  | mitochondrion, membrane fraction     | mitochondrial electron transport, NADH to ubiquinone, nervous system development                                        |
| 52 | 3-hydroxyisobutyrate dehydrogenase                                                 | 34855881 | 23.86 | 100.30 | 10 | mitochondrion                        | pentose-phosphate shunt, valine metabolism                                                                              |
| 53 | gamma actin-like protein                                                           | 34856512 | 14.94 | 50.25  | 5  | cytoskeleton                         | structural constituent of cytoskeleton, sarcomere organization                                                          |
| 54 | Atp5c1 protein                                                                     | 37747914 | 22.07 | 88.21  | 7  | membrane fraction, mitochondrion,    | generation of precursor metabolites and energy, ion transport, ATP synthesis coupled proton transport, ATP biosynthesis |
| 55 | ATP synthase, H <sup>+</sup> transporting, mitochondrial F1 complex, beta polypept | 34862189 | 45.73 | 180.28 | 18 | mitochondrion, integral to membrane, | generation of precursor metabolites and energy, ion transport, ATP synthesis coupled proton transport                   |
| 56 | creatine kinase, sarcomeric mitochondrial precursor                                | 34853112 | 6.11  | 30.24  | 3  | mitochondrion inner membrane         | Reversibly catalyzes the transfer of phosphate between ATP and various phosphogens (e.g. creatine phosphate).           |
| 57 | propionyl-Coenzyme A carboxylase, alpha polypeptide                                | 34876107 | 18.82 | 90.26  | 9  | mitochondrion; mitochondrial matrix  | Carbohydrate metabolism; propanoate metabolism                                                                          |
| 58 | voltage-dependent anion-selective channel protein 1                                | 10720216 | 22.20 | 70.25  | 7  | mitochondrial outer membrane         | anion transport, apoptotic program, ion transport, apoptosis                                                            |
| 59 | cytochrome c-1                                                                     | 34866853 | 12.45 | 30.23  | 3  | mitochondrion, membrane              | electron transport                                                                                                      |
| 60 | isocitrate dehydrogenase 3 (NAD <sup>+</sup> ) alpha                               | 16758446 | 24.44 | 90.22  | 9  | mitochondrion                        | carbohydrate metabolism, tricarboxylic acid cycle                                                                       |

|    |                                                          |          |       |        |    |                                     |                                                                                                                                                              |
|----|----------------------------------------------------------|----------|-------|--------|----|-------------------------------------|--------------------------------------------------------------------------------------------------------------------------------------------------------------|
| 61 | fumarate hydratase 1                                     | 8393358  | 23.69 | 130.28 | 12 | cytoplasm,<br>mitochondrion         | tricarboxylic acid cycle, fumarate metabolism, cell cycle, negative regulation of progression through cell cycle, fumarate metabolism                        |
| 62 | glutamate oxaloacetate transaminase 2                    | 6980972  | 29.23 | 170.27 | 14 | mitochondrion                       | amino acid metabolism, aspartate catabolism                                                                                                                  |
| 63 | NADH dehydrogenase (ubiquinone) flavoprotein 1           | 34861382 | 19.82 | 100.26 | 10 | mitochondrial inner membrane        | electron transport, mitochondrial electron transport-NADH to ubiquinone, generation of precursor metabolites and energy                                      |
| 64 | lysophospholipase 1                                      | 6981362  | 22.27 | 40.21  | 44 | membrane fraction                   | Lipid metabolism, fatty acid metabolism,                                                                                                                     |
| 65 | tropomyosin 4                                            | 14134107 | 4.92  | 40.25  | 4  | cytoskeleton                        | cell motility, structural constituent of muscle, calcium dependent regulation of muscle contraction, Binds to actin filaments in muscle and non-muscle cells |
| 66 | ubiquinol-cytochrome c reductase binding protein         | 27677468 | 41.59 | 70.20  | 7  | mitochondrial inner membrane        | ubiquinol-cytochrome-c reductase activity, electron transport                                                                                                |
| 67 | NADH dehydrogenase 1 alpha subcomplex 10-like protein    | 34877665 | 14.95 | 50.25  | 5  | membrane fraction,<br>mitochondrion | generation of precursor metabolites and energy, nucleobase, nucleoside, nucleotide and nucleic acid metabolism                                               |
| 68 | methylmalonate semialdehyde dehydrogenase gene           | 13591997 | 10.99 | 60.20  | 6  | mitochondrion                       | pyrimidine nucleotide metabolism, valine metabolism, thymine metabolism                                                                                      |
| 69 | cytochrome c oxidase, subunit Va                         | 24233541 | 17.93 | 38.23  | 4  | mitochondrion                       | electron transport                                                                                                                                           |
| 70 | NADH dehydrogenase (ubiquinone) Fe-S protein 2           | 34880923 | 12.76 | 40.24  | 4  | membrane fraction,<br>mitochondrion | electron transport, mitochondrial electron transport-NADH to ubiquinone                                                                                      |
| 71 | Mitochondrial H <sup>+</sup> -ATP synthase alpha subunit | 38512279 | 21.99 | 110.27 | 11 | membrane fraction,<br>mitochondrion | ion transport, ATP synthesis coupled proton transport, proton transport,ATP biosynthesis                                                                     |
| 72 | hydroxyacyl dehydrogenase, subunit B                     | 19424338 | 13.18 | 70.20  | 6  | mitochondrial envelope              | lipid metabolism, fatty acid metabolism, fatty acid beta-oxidation                                                                                           |
| 73 | citrate synthase                                         | 18543177 | 9.28  | 30.25  | 3  | cytoplasm,<br>mitochondrion         | tricarboxylic acid cycle, main pathways of carbohydrate metabolism                                                                                           |
| 74 | inner membrane protein                                   | 34855983 | 20.94 | 128.27 | 13 | mitochondrial inner membrane        | critical organizer of the mitochondrial cristae morphology and thus indispensable for normal mitochondrial function                                          |
| 75 | ubiquinol-cytochrome c reductase core protein 1          | 34866355 | 18.08 | 80.23  | 8  | mitochondrion,<br>membrane          | oxidative phosphorylation, aerobic respiration, electron transport, transport                                                                                |
| 76 | enolase 3, beta; Muscle specific enolase                 | 6978811  | 8.28  | 40.23  | 4  | phosphopyruvate                     | glycolysis                                                                                                                                                   |

|    |                                                         |          |       |        |    |                              |                                                                                                                                        |
|----|---------------------------------------------------------|----------|-------|--------|----|------------------------------|----------------------------------------------------------------------------------------------------------------------------------------|
|    |                                                         |          |       |        |    | hydratase complex            |                                                                                                                                        |
| 77 | electron transfer flavoprotein alpha-subunit            | 27720225 | 30.22 | 80.27  | 8  | mitochondrial matrix         | electron transport                                                                                                                     |
| 78 | MD-1 [Rattus norvegicus]                                | 34875250 | 3.43  | 10.14  | 1  | plasma membrane              | apoptosis, inflammatory response, humoral immune response, signal transduction, cell proliferation, immune response                    |
| 79 | isovaleryl Coenzyme A dehydrogenase                     | 6981112  | 24.31 | 110.23 | 11 | mitochondrial matrix         | electron transport, metabolism                                                                                                         |
| 80 | voltage-dependent anion channel 2                       | 13786202 | 20.26 | 50.31  | 5  | mitochondrial outer membrane | anion transport, ion transport                                                                                                         |
| 81 | dihydrolipoamide acetyltransferase                      | 220838   | 12.72 | 60.25  | 6  | mitochondrion                | acetyl-CoA biosynthesis, glycolysis                                                                                                    |
| 82 | short chain acyl-coenzyme A dehydrogenase               | 11968090 | 16.91 | 60.24  | 6  | mitochondrion                | electron transport, lipid metabolism, fatty acid metabolism, fatty acid beta-oxidation, generation of precursor metabolites and energy |
| 83 | dnaK-type molecular chaperone grp75 precursor           | 2119726  | 18.86 | 118.24 | 12 | mitochondrion                | Control of cell proliferation and cellular aging. It may also act as a chaperone                                                       |
| 84 | acetyl-coenzyme A acetyltransferase 1                   | 8392836  | 21.73 | 80.29  | 9  | mitochondrion                | catalyzes the conversion of 2 acetyl-CoA molecules to acetoacetyl-CoA plus CoA                                                         |
| 85 | ubiquinol-cytochrome C reductase complex core protein 2 | 27679580 | 3.16  | 10.27  | 2  | mitochondrial inner membrane | electron transport, oxidative phosphorylation, proteolysis, aerobic respiration                                                        |
| 86 | cytochrome c oxidase, subunit VIa, polypeptide 2        | 6978691  | 12.48 | 10.17  | 1  | mitochondrial envelope       | electron transport, generation of precursor metabolites and energy                                                                     |
| 87 | mitochondrial aldehyde dehydrogenase                    | 25990263 | 29.36 | 120.28 | 12 | mitochondrion                | carbohydrate metabolism, alcohol metabolism, metabolism                                                                                |
| 88 | parvalbumin (calcium binding protein)                   | 11968064 | 30.41 | 50.23  | 5  | cytoplasm                    | calcium-binding protein is involved in muscle relaxation                                                                               |
| 89 | heat shock protein, mitochondrial precursor (Hsp60)     | 34876438 | 11.13 | 128.20 | 7  | mitochondrion matrix         | mitochondrial protein import and macromolecular assembly, facilitates correct folding of imported proteins.                            |
| 90 | dihydrolipoamide branched chain transacylase E2         | 34859889 | 14.67 | 60.22  | 6  | mitochondrion matrix         | amino acid metabolism                                                                                                                  |
| 91 | hypothetical protein FLJ10759                           | 34860175 | 21.99 | 80.29  | 8  | intracellular                | transcription regulator activity                                                                                                       |
